# Supplementary material for: Gamma Knife stereotactic radiotherapy combined with tislelizumab as later-line therapy in pMMR/MSS/MSI-L metastatic colorectal cancer: a phase II trial analysis
Source: eLife. 2025 Jun 26;14:RP103559. doi: 10.7554/eLife.103559 (PMC12201948; doi:10.7554/eLife.103559)
Supplement: Source data 1. [file elife-103559-data1.xlsx]

## Sheet: Source Data
gene	44222269002F1R1	44225676905F1R1	44229840505F1R1	44228118302F1R1	44229815702F1R1	44229815705F1R1	44229815701F1R1	TIS39192894F1R1	TIS43192895F1R1	TIS73192896F1R1	TIS38192897F1R1	TIS33192898F1R1	TIS24192899F1R1	TIS11192903F1R1	TIS79192904F1R1	TIS89192970F1R1	TIS58192971F1R1	TIS75192972F1R1	TIS53192973F1R1	TIS66192974F1R1	TIS81192975F1R1	TIS69192976F1R1	TIS73192977F1R1	TIS92192978F1R1	TIS41192979F1R1	TIS10192980F1R1	TIS23192981F1R1	TIS60192982F1R1	TIS45192983F1R1	TIS48192984F1R1	TIS86192985F1R1	TIS85192986F1R1	TIS89192989F1R1
SDHA	4431	7781	1068	982	36	6325	2334	255	356	1109	909	825	970	645	554	1365	778	870	720	473	643	133	472	258	1087	469	530	224	750	551	209	513	558
ITGAL	277	350	72	92	5	343	1358	96	218	584	4883	1965	577	734	209	77	102	20	95	25	46	13	164	11	78	158	31	24	43	28	18	29	73
TNFSF13B	415	522	40	169	14	333	1136	83	45	107	104	56	42	49	38	55	66	78	104	28	30	15	70	33	84	74	31	19	80	75	17	13	80
CTSW	53	132	33	35	8	23	72	540	601	1038	558	984	768	642	623	19	40	17	53	46	19	59	29	11	25	32	42	1	13	14	8	13	42
PTGER4	647	135	47	151	27	143	447	68	36	221	743	118	425	98	40	116	57	28	54	76	76	88	108	23	122	100	127	29	107	97	52	121	69
GNLY	76	156	11	18	2	102	75	7	8	9	12	9	2	4	5	15	15	8	68	46	11	32	10	8	10	18	42	5	18	13	14	7	26
C1QB	3406	4627	945	1247	257	2434	10142	378	146	687	504	523	793	405	228	596	950	304	818	295	267	73	1463	128	548	673	148	239	463	230	76	369	566
PSMB10	1196	1427	329	468	108	1124	1274	491	160	398	532	382	903	428	351	616	544	244	595	195	353	87	339	85	430	243	232	112	344	261	81	444	464
HSD11B1	88	42	7	17	6	191	147	110	105	294	125	131	115	76	93	5	17	8	5	5	4	2	22	6	8	28	1	1	5	3	2	2	10
IRF1	549	536	219	137	51	440	517	178	383	1257	626	290	1001	411	295	272	220	128	470	110	121	96	155	143	138	148	96	77	195	109	88	199	296
CXCR2	89	59	22	13	7	421	353	19	11	29	20	4	4	6	8	25	29	13	49	66	5	24	293	457	16	30	41	10	21	8	3	12	13
PDCD1LG2	96	494	23	24	3	154	385	57	107	293	172	188	224	169	74	20	14	4	17	3	6	0	30	3	10	18	1	2	7	1	2	2	9
BTLA	66	51	22	22	11	61	170	45	51	377	154	81	264	99	58	32	38	16	25	19	18	18	37	5	27	36	12	4	18	15	4	21	22
C1QA	1206	1313	411	590	89	1073	3810	109	132	366	209	222	611	174	108	202	450	116	331	123	111	21	553	36	244	348	97	91	212	90	51	177	259
GZMA	499	836	65	150	34	1161	683	74	128	489	205	316	392	138	111	113	80	19	259	41	55	16	212	12	53	89	21	22	45	39	6	85	56
TDO2	356	1362	75	40	12	694	754	25	37	131	69	12	29	8	11	703	78	22	39	53	33	57	399	29	64	82	51	13	25	20	15	6	904
HERC6	241	1149	267	149	26	168	1148	846	402	504	1123	285	366	456	513	73	64	27	81	16	34	12	32	8	44	28	18	13	34	20	14	28	77
ABCF1	1515	3805	295	513	42	6437	1017	1564	954	1032	2404	791	1030	1145	989	579	504	230	386	225	197	31	272	171	283	247	175	100	165	217	67	94	299
TGFB1	3000	4939	551	684	1012	1049	1969	119	63	189	76	61	33	41	50	819	689	457	455	348	308	83	824	545	557	851	236	449	336	293	282	241	695
LYZ	5095	10063	10874	1495	332	13963	99191	305	82	90	299	155	139	86	126	13886	1167	1107	454	104	4610	502	1123	79	1103	515	692	125	416	128	39	2453	557
ITGA1	3011	3289	413	707	32	1738	1576	292	117	534	1091	268	365	393	427	990	351	251	273	167	317	71	274	45	401	433	183	311	212	346	210	74	416
CD28	100	38	37	21	5	57	134	1031	1561	3311	39762	1234	6156	2857	885	20	27	7	18	9	13	4	29	6	10	24	4	1	6	6	3	7	15
IL17A	21	15	6	4	0	10	28	341	437	289	10	325	47	773	618	9	2	1	1	2	10	1	2	0	3	4	0	2	6	4	0	8	2
IL6	709	189	172	31	3	839	114	60	59	133	175	28	48	31	26	19	35	32	28	6	14	8	89	9	29	28	16	8	6	6	4	8	27
GUSB	2623	1896	476	602	426	1419	2832	347	154	521	1584	338	92	171	165	1256	830	488	434	379	431	128	524	180	942	303	426	191	541	463	122	344	561
CD274	193	836	77	47	6	305	356	679	413	743	610	164	159	171	251	69	74	24	132	33	27	27	98	12	48	98	24	9	34	30	10	35	77
CXCR3	88	54	26	36	26	83	210	4	4	8	18	3	11	5	8	18	38	23	44	16	8	36	28	5	17	22	22	6	22	5	4	10	29
AXL	2148	1010	609	575	32	492	1637	751	702	1814	2590	402	2449	2042	1998	347	376	128	278	124	209	38	355	470	229	392	122	247	167	129	151	50	331
IL15	75	130	38	58	8	99	109	53	9	76	96	26	19	20	16	51	48	20	59	16	43	16	42	7	29	25	33	18	25	35	14	34	43
FPR1	135	107	35	39	10	116	235	46	15	118	84	11	39	11	17	8	31	12	14	26	8	20	131	44	8	12	11	1	6	4	3	1	12
TNFSF9	230	974	186	78	8	594	345	63	48	60	58	11	30	27	19	344	22	30	33	64	211	31	89	19	22	36	27	30	14	175	7	24	39
IL4	15	13	2	7	3	12	24	907	316	837	1199	883	892	828	529	1	1	3	3	8	2	4	5	1	4	9	3	1	8	1	1	1	6
PDCD1	22	29	11	6	2	42	64	47	16	29	49	30	26	43	41	7	18	11	27	20	8	27	16	3	7	9	18	3	9	13	6	12	6
IFI35	628	2287	372	388	38	744	987	52	31	57	42	9	7	20	5	215	277	72	226	80	115	29	111	44	155	147	75	63	115	78	54	131	198
CD3D	392	412	102	68	11	564	766	28	15	34	16	7	22	8	10	51	82	14	125	61	49	32	117	7	48	95	29	13	52	30	16	63	73
CD74	27575	18213	6618	12151	1483	22718	76382	54	42	59	58	16	27	21	18	5974	12329	2207	12649	3627	4730	973	12699	1128	6667	8934	2666	3014	5615	3353	2032	7572	8496
ICOS	115	222	47	35	5	107	208	92	172	166	186	75	67	113	104	30	37	4	52	20	14	28	23	1	14	46	18	6	15	12	9	12	31
KIR2DL3	17	45	11	5	5	49	28	7	3	10	13	4	10	4	5	5	9	3	24	3	3	4	7	0	4	6	2	2	3	3	3	9	3
SELL	181	87	72	46	21	210	482	138	89	209	217	36	100	46	56	29	68	17	30	38	23	13	96	90	26	32	11	7	12	12	10	12	20
IL10RA	607	680	94	221	9	540	1348	93	88	282	256	41	36	26	35	81	183	57	179	73	70	54	420	34	120	282	71	58	77	39	41	55	136
CD1C	47	35	19	17	4	21	124	73	39	122	220	144	57	36	64	13	13	10	3	4	10	10	5	1	9	6	14	5	8	3	5	2	16
G6PD	647	6311	270	283	137	6270	895	843	651	1165	1234	537	2134	1011	473	430	301	305	208	195	160	46	171	93	210	101	145	74	278	129	42	119	154
PECAM1	2632	2231	409	484	30	4008	7297	55	19	76	66	8	27	15	10	337	444	144	204	115	182	19	755	125	273	424	117	106	98	98	130	46	249
IL7R	538	1409	86	60	1	541	1435	67	94	180	262	49	35	48	173	172	230	61	108	96	106	17	261	12	77	187	74	42	104	72	13	53	98
BRCA1	358	1118	94	83	8	227	166	170	114	446	366	30	121	46	44	197	121	85	40	55	42	11	42	22	69	25	53	8	46	23	7	12	49
CCR5	164	91	47	45	9	118	209	174	108	287	248	34	83	34	65	31	51	7	61	16	25	3	84	5	35	52	13	17	20	14	7	10	27
EOMES	36	45	14	19	17	43	43	44	18	82	60	16	32	15	10	4	18	10	18	3	8	5	27	9	13	14	5	5	16	14	3	15	9
EGFR	1427	10650	437	358	32	651	1012	235	109	291	301	128	273	166	124	636	366	233	190	103	117	22	101	137	232	130	74	69	139	162	50	88	187
SPIB	61	16	29	16	3	34	74	122	81	335	219	110	161	225	81	27	34	6	20	14	25	14	27	7	22	14	19	5	7	10	3	17	7
IL21R	128	159	44	75	15	174	328	37	28	70	43	12	14	11	9	41	96	15	79	23	21	12	83	11	46	119	19	13	36	13	18	33	59
CD40	420	609	48	79	64	349	801	3024	3728	8264	6064	4876	9663	2952	1980	94	88	82	90	55	47	36	113	24	70	97	84	26	165	22	40	71	69
TFRC	4727	15561	1060	1182	44	4633	2882	747	767	4817	2499	1636	4611	1766	894	2039	1004	1465	1325	1086	515	86	922	342	1633	476	315	225	704	1317	123	258	1056
TLR7	62	39	20	25	14	9	135	295	334	449	717	137	102	126	130	9	25	10	18	50	9	34	24	5	9	21	13	10	7	12	5	0	18
HLA-DMB	915	1094	230	339	11	916	3563	83	63	112	73	34	65	70	28	132	190	47	333	92	71	57	369	28	136	197	65	51	105	44	43	87	167
IFIH1	452	1793	178	208	23	422	1029	941	745	1142	1099	846	660	854	551	131	105	28	128	33	60	31	89	29	72	79	24	28	50	33	22	42	77
IL2RG	1131	637	584	415	37	686	1070	148	83	186	756	186	69	59	99	209	326	160	149	118	68	15	253	28	99	185	95	25	218	47	32	79	100
IFIT2	205	585	131	156	3	149	447	94	17	44	52	17	34	25	18	48	63	14	42	21	12	27	24	69	22	34	35	5	13	7	7	4	29
ENTPD1	3545	2334	271	723	71	1312	1918	19039	9909	24014	14395	11857	7638	6978	6870	446	492	171	332	179	268	74	711	70	345	703	204	222	241	152	171	132	398
LY9	124	116	26	35	6	70	313	181	247	653	354	51	32	53	25	12	27	9	18	30	15	42	53	6	24	45	37	2	6	12	3	15	26
HLA-DPA1	3559	2529	532	499	20	1619	8645	144	119	143	129	16	30	30	20	156	178	52	386	75	86	24	189	9	205	302	42	51	68	59	27	60	239
MTOR	685	1218	157	260	15	474	558	48	56	92	174	60	82	23	61	287	156	106	186	68	120	21	98	109	144	118	93	76	112	130	53	127	121
FCGR2B	723	556	119	159	9	1177	1168	301	107	189	159	107	147	142	136	75	174	55	114	31	50	38	316	33	97	197	49	55	73	30	26	26	59
HLA-DQA2	19	16	9	19	3	24	109	40	14	40	90	31	37	29	18	8	1	5	2	12	1	16	5	0	0	11	7	1	1	4	0	1	4
ITGAE	75	306	28	28	3	292	189	179	132	240	146	37	36	69	88	31	61	20	138	10	17	2	34	2	29	31	11	3	26	9	8	27	25
HAVCR2	210	474	66	96	5	264	516	38	29	57	39	5	41	57	17	40	41	16	50	19	15	7	77	7	22	44	7	5	20	12	6	9	18
IRF4	322	652	59	110	46	388	1740	8	3	51	11	6	16	22	10	74	284	64	197	127	44	138	224	40	110	826	145	40	74	38	78	174	217
TRAT1	86	19	21	20	7	81	137	27	25	22	33	9	3	9	14	18	31	9	41	15	21	6	56	4	26	34	15	8	17	10	10	19	21
CD70	106	133	35	29	29	38	95	230	78	113	254	67	77	109	90	37	18	22	28	71	30	70	21	82	16	44	43	9	26	11	7	7	27
NOS2	101	29	73	27	5	14	27	160	94	129	232	88	217	72	82	680	89	64	232	19	213	183	8	6	75	34	39	28	149	124	10	695	180
LCK	162	214	164	53	7	217	378	96	50	40	55	37	46	45	64	80	89	76	60	52	80	35	69	5	40	56	19	11	35	96	12	23	49
IFNG	34	80	10	7	3	55	28	20	10	26	185	21	5	10	12	4	6	3	20	8	6	4	6	1	2	2	4	0	1	5	0	2	2
CDKN2A	54	12	44	22	2	159	34	84	61	162	236	60	57	54	61	17	7	22	10	12	4	7	5	23	4	11	7	4	4	9	4	6	22
DLL4	516	177	66	177	49	457	284	248	160	362	407	256	111	234	161	112	128	83	123	99	59	27	110	22	107	124	94	61	82	67	44	99	121
CD3E	403	223	77	61	17	314	541	9	7	12	16	4	3	2	3	69	124	22	142	47	69	7	173	13	66	98	34	17	45	33	19	68	84
CD79A	388	342	76	42	67	216	991	66	42	157	189	32	62	14	47	56	234	28	44	15	23	10	284	137	63	216	10	10	19	12	4	123	66
CCR2	99	30	29	41	13	81	259	2299	1381	9186	7921	3411	6911	2983	1713	21	27	6	15	22	7	22	40	7	14	24	18	5	11	6	6	4	14
FCRL2	65	58	14	18	15	67	153	45	38	22	19	9	9	23	19	16	40	9	15	8	16	5	48	1	12	65	11	2	5	7	12	13	15
EIF2AK2	1216	4665	685	468	42	828	1288	56	26	317	100	50	135	109	51	238	211	88	167	55	64	21	124	46	143	102	66	35	85	94	24	46	144
NFKBIA	4604	5538	1802	733	145	2950	3430	66	16	47	87	5	44	20	16	2454	1264	622	1008	663	636	153	2268	571	989	971	480	310	587	438	256	737	915
RB1	2534	2666	141	621	28	817	794	1483	1706	6462	18287	600	2254	3872	1749	300	238	297	275	137	105	44	238	65	477	179	143	42	276	151	52	54	251
CD68	2003	2391	581	755	619	2344	6202	102	32	128	186	84	70	46	213	528	545	253	436	307	187	205	901	238	1021	468	203	149	329	227	66	223	319
KIR3DL2	23	20	19	18	6	24	18	129	26	137	83	60	98	27	222	8	10	12	19	67	7	64	8	8	11	11	53	3	11	19	10	5	34
MS4A2	102	45	32	30	8	45	169	558	38	313	37	160	67	171	109	22	25	11	16	6	4	4	23	6	44	33	11	8	5	8	0	3	11
CTAG1B	12	11	7	15	20	11	13	288	91	155	80	19	18	19	35	1	3	3	7	2	5	3	4	2	3	2	2	2	3	2	9	4	3
ADM	2381	7578	304	549	311	2727	782	30	154	99	41186	486	110	241	196	837	133	267	81	88	112	23	266	204	196	80	37	52	90	119	32	97	187
HLA-DMA	1451	1013	319	491	73	1008	4498	260	1317	2782	24056	6652	1139	2344	1016	304	399	104	765	137	193	48	649	38	226	305	112	93	143	120	73	349	243
GZMB	282	696	42	23	20	728	377	838	372	278	140	53	175	90	464	96	146	17	168	85	18	8	115	368	25	32	57	13	67	42	6	14	99
CCL20	12460	629	496	260	114	7380	1884	34	60	152	252	94	28	53	22	1946	2376	717	282	1798	357	108	637	26	892	838	567	225	1403	834	62	2977	1205
CSF3R	308	246	116	186	11	1133	1021	48	26	68	52	3	63	33	23	106	238	70	322	186	39	97	1529	1463	125	274	160	36	115	50	29	33	72
MS4A1	45	19	23	15	23	41	47	1101	406	989	1083	2218	852	555	458	14	51	9	39	12	37	1	117	8	70	32	20	2	11	5	2	48	15
HLA-DOB	111	179	24	38	24	140	359	72	40	127	75	10	51	16	22	26	35	22	21	14	15	23	56	11	19	45	12	5	24	45	4	18	28
S100A9	866	7788	319	174	26	22564	24536	645	480	497	547	238	470	364	392	531	476	385	460	475	56	81	1797	1003	308	428	167	99	131	175	21	107	216
CCL18	851	1866	773	114	17	5902	3918	91	97	222	850	379	416	122	181	192	49	19	45	23	3	4	130	3	51	36	6	17	22	5	6	19	7
MAGEA12	5	12	6	16	8	16	12	126	167	569	620	283	402	363	171	82	201	3	6	17	1	25	1	1	4	5	15	0	7	3	2	4	8
CXCL12	229	29	77	204	227	90	197	137	143	652	986	395	869	332	182	85	163	60	124	51	105	46	580	53	91	211	107	89	89	58	126	45	78
NT5E	242	549	250	76	238	118	106	369	216	664	789	569	1237	449	387	119	50	49	44	27	55	39	80	356	30	43	40	67	25	58	27	84	21
CXCL11	355	1088	164	42	25	48	188	30	19	29	36	17	8	16	17	246	141	14	2034	21	13	13	9	5	28	22	6	4	65	59	5	55	55
CYBB	1965	1620	415	381	48	1307	5163	225	97	481	260	244	215	149	68	332	475	75	260	137	173	31	693	41	264	431	81	158	170	65	53	104	257
CD86	126	388	38	39	18	130	259	17	15	35	28	8	6	10	8	17	20	4	9	14	5	11	19	3	15	19	10	2	8	6	3	5	15
TNF	194	313	44	44	19	180	500	11	19	29	78	37	12	12	17	51	24	10	59	13	23	10	29	8	24	39	31	9	40	8	12	59	24
IFIT1	324	2543	544	188	22	110	905	161	45	61	75	90	79	107	77	84	71	3	51	6	26	16	15	86	34	51	18	18	20	4	11	5	24
PTPRC	547	494	96	136	25	504	1090	271	106	126	223	192	72	130	103	88	118	31	89	44	51	19	283	73	65	115	35	12	42	35	10	38	73
CCR4	137	69	55	31	11	111	284	36	22	61	46	2	11	6	4	23	21	7	20	21	11	13	28	2	18	34	11	3	11	5	1	6	17
CPA3	508	158	123	109	12	281	716	11	2	26	20	26	30	45	26	99	58	25	35	38	24	27	64	9	148	92	39	23	16	21	7	10	44
FGF13	180	48	12	47	13	31	48	28	36	50	75	14	59	21	38	21	18	8	11	13	24	10	12	4	10	15	19	2	17	3	10	2	20
FUT4	704	94	218	248	28	110	117	48	27	75	142	140	33	35	19	682	255	121	223	221	159	52	118	14	718	83	129	35	213	169	27	96	210
ICOSLG	425	263	113	86	11	75	129	152	262	409	403	389	528	510	333	145	109	65	154	106	77	30	99	15	65	84	60	29	60	82	17	43	118
IL2	10	18	4	8	6	6	19	167	235	1335	424	349	472	262	208	3	5	2	2	2	2	3	2	1	4	3	3	0	0	1	1	2	1
CD40LG	99	20	28	32	22	27	96	997	350	811	774	248	579	330	540	22	37	9	5	19	21	16	19	4	18	17	18	8	18	5	5	14	22
CD209	183	328	84	39	51	179	106	38	33	35	42	11	32	20	15	64	61	15	119	51	25	34	51	18	93	57	29	37	78	20	14	60	81
CCL22	89	129	53	55	29	269	482	585	499	1788	2172	2916	2469	1053	454	34	36	16	22	34	22	19	12	16	22	21	35	5	11	17	4	6	21
IFI27	20575	55649	21106	10523	408	9266	25777	305	170	525	341	97	100	76	104	8845	5276	1700	2115	766	2720	386	1867	468	4194	1564	1366	894	2633	3188	374	1990	2836
VEGFA	9277	2765	1013	3643	185	13523	4279	97	40	264	597	30	48	152	197	2446	816	2602	686	977	537	92	827	241	915	608	428	231	518	772	210	267	1621
BRCA2	565	907	54	165	44	235	152	42	14	36	65	11	25	14	20	123	135	195	149	99	48	29	82	57	181	57	134	22	135	42	19	60	110
CD163	66	69	37	39	15	81	113	107	33	130	130	28	43	20	29	19	31	17	35	17	15	6	76	6	14	13	10	4	18	14	9	2	12
NKG7	621	509	116	97	24	917	1044	89	41	58	97	74	91	68	69	132	278	30	414	53	49	9	458	34	85	183	27	24	84	55	23	113	99
CCL2	1162	894	371	350	17	999	1521	21	13	19	30	20	17	26	12	98	139	77	63	66	34	19	95	26	68	148	70	38	29	11	31	7	185
STAT4	163	184	43	48	10	114	204	93	75	426	302	165	287	117	98	43	43	22	49	20	28	17	90	8	21	41	21	13	26	29	8	16	40
TLR9	50	34	18	32	22	31	72	922	891	3844	3791	2181	2155	1209	876	14	25	6	17	22	10	20	17	11	12	24	19	2	6	11	6	4	11
IL12RB2	36	842	15	5	11	53	42	1077	340	1531	635	377	357	387	355	6	24	4	9	7	5	6	9	3	3	7	4	7	3	3	7	6	7
PRF1	218	485	53	51	27	661	1298	688	217	968	508	180	223	252	229	76	106	147	206	55	37	59	198	25	63	51	36	10	46	34	14	57	103
CD44	7219	43081	2463	2667	6621	3173	7707	37	22	29	23	14	23	11	15	2420	3327	1596	2382	1638	2262	895	2607	1352	2761	2179	1077	1435	1454	2186	874	5082	2035
IL2RB	437	414	164	164	13	451	610	42	37	90	73	16	37	27	13	117	260	38	252	107	88	55	188	31	111	183	80	31	79	45	33	72	167
ITGAM	232	203	60	101	18	234	1013	1091	433	1477	663	427	681	263	361	58	60	21	38	30	28	14	108	34	42	47	24	21	15	15	12	7	26
CXCL9	2525	6722	249	476	49	1044	1578	6	0	11	6	4	14	4	0	910	918	72	2386	247	85	37	296	35	177	522	38	41	407	124	53	157	463
TBP	612	1689	142	187	13	584	589	3852	1199	8107	4400	1473	2494	1544	1627	232	134	100	90	88	54	38	86	33	68	96	56	16	86	76	25	63	108
CD244	12	18	2	15	7	14	14	27	5	9	26	28	17	14	13	4	8	2	4	10	5	19	3	0	3	6	15	0	1	2	0	0	4
CXCR4	3525	694	731	788	40	4118	2370	391	194	594	1168	546	569	367	387	540	651	337	436	317	617	42	3830	847	522	647	112	59	189	200	51	127	327
PTEN	6226	7145	1587	1153	48	3118	4038	43	16	79	170	8	32	18	28	1694	1018	908	742	478	829	105	1043	244	1168	776	211	272	465	675	277	215	756
TNFRSF9	96	143	36	28	15	115	161	41	51	156	105	173	205	129	109	21	24	4	47	14	9	7	7	14	11	42	14	6	11	11	6	6	23
MRC1	343	1833	225	68	20	318	4719	320	114	768	276	50	101	60	308	97	92	79	73	66	20	12	81	11	65	46	30	25	114	26	19	13	59
CXCL1	3675	2884	1570	837	31	849	637	4058	2540	20246	20196	15143	7717	3518	3903	2220	895	338	1813	316	402	42	511	376	605	1244	748	55	1268	611	59	1448	461
GZMH	133	111	12	17	9	150	199	175	170	585	610	226	317	187	101	32	33	6	84	20	11	1	70	5	15	30	5	2	12	12	0	7	25
SNAI1	626	236	117	154	21	159	84	402	329	2672	4980	3427	515	358	597	101	58	46	56	103	19	46	113	35	28	50	99	9	64	41	33	9	94
MS4A4A	646	1078	215	289	18	709	2370	128	110	421	503	521	203	147	145	112	156	38	126	62	48	22	163	27	121	109	38	28	56	38	19	28	69
TCL1A	18	13	2	15	8	13	37	76	65	290	807	181	87	91	112	6	5	5	8	8	2	8	7	0	12	6	10	1	4	5	2	4	3
TNFSF18	51	61	13	31	12	25	65	65	33	86	261	137	53	91	94	7	7	0	6	6	2	0	3	4	10	2	2	4	5	4	2	3	7
IDO1	983	1841	174	79	14	684	1166	84	54	244	438	153	116	70	111	466	353	48	1921	78	45	36	59	24	69	137	71	13	165	28	28	66	159
CD247	206	190	89	63	9	288	454	2010	1218	6104	33391	1390	9011	6853	1920	90	137	24	107	68	49	35	134	25	52	127	48	8	45	31	17	26	79
VTCN1	15	96	23	17	14	24	24	327	191	578	755	177	1165	409	103	11	10	6	7	23	8	30	2	1	2	10	23	0	4	9	2	6	6
MKI67	798	3658	429	200	32	1000	202	18	6	16	58	4	8	8	3	1007	353	446	454	217	253	60	183	220	543	148	300	53	219	325	56	95	201
CCL21	1226	1584	227	130	31	1976	595	26	13	36	30	10	15	16	16	330	259	127	245	144	168	55	103	106	178	279	109	133	79	73	158	12	118
TIGIT	249	260	114	67	15	198	321	229	138	357	298	198	119	208	176	37	99	17	74	22	24	17	64	5	36	79	22	17	24	14	11	28	54
ATM	1480	2525	274	415	26	1301	2250	16	16	37	30	10	16	14	4	444	322	153	268	229	196	44	308	87	231	304	123	70	193	127	73	112	198
CD48	670	239	146	136	90	457	804	47	44	91	49	34	30	30	63	148	288	63	230	83	89	39	521	68	170	247	94	42	89	48	43	134	114
PSMB9	1924	7519	395	465	53	978	2123	13	6	84	173	3	15	5	2	614	814	185	887	73	152	31	279	86	346	212	137	44	307	148	35	303	449
LILRB2	204	252	83	102	9	235	332	122	123	429	166	109	82	108	97	61	149	34	99	28	34	22	351	48	43	148	48	25	51	16	15	17	57
CSF2	20	99	50	12	9	17	218	9	32	28	225	28	35	23	19	6	9	2	10	6	1	7	5	4	0	1	5	0	2	3	1	1	3
PDGFB	234	414	46	108	17	150	179	57	112	271	2257	211	44	148	55	94	67	70	71	176	42	138	87	46	63	87	123	30	46	74	65	16	150
IL18	290	1942	546	184	24	162	428	6	0	3	4	5	3	3	2	281	212	34	79	63	75	22	94	148	90	54	31	37	97	99	16	45	123
IL10	43	46	16	14	7	41	55	110	55	97	78	16	56	18	40	10	11	3	12	6	2	4	24	7	4	8	7	3	9	3	4	4	9
TNFSF10	1683	9245	443	489	182	1679	3466	71	51	116	266	72	82	47	66	409	383	122	429	97	276	81	209	120	370	247	135	111	351	128	120	444	153
SIGLEC5	88	53	22	29	23	61	156	251	234	377	267	41	191	79	148	19	32	17	32	27	28	26	193	88	22	51	23	11	17	12	7	12	18
VCAM1	569	722	171	196	21	949	1344	298	189	833	941	359	1678	620	222	210	143	21	100	58	57	9	199	25	68	139	37	33	47	24	25	37	120
HDC	50	47	24	27	5	38	75	10	6	16	8	1	4	3	3	20	21	9	15	23	8	24	7	3	46	21	21	16	14	11	9	12	22
MAGEA4	15	19	6	16	11	11	7	55	37	57	994	363	104	183	214	3	14	3	7	7	1	4	6	3	2	3	1	0	7	5	2	2	3
ANGPT2	416	871	58	170	12	1082	186	128	118	365	812	130	239	63	87	92	71	29	18	52	38	20	39	17	45	49	13	4	28	24	19	11	49
PMS2	550	1004	105	119	6	263	273	414	218	502	501	310	199	150	266	159	92	63	70	69	63	26	57	29	69	44	64	31	70	52	19	33	87
TAP1	1092	5405	461	316	50	897	1238	168	173	718	619	57	40	90	44	839	724	204	1083	115	215	67	262	67	424	213	120	85	285	249	45	212	461
RAD51	91	581	37	32	4	180	31	588	494	1421	1114	2034	839	593	805	45	24	34	21	12	20	3	14	14	14	7	6	2	13	15	2	8	25
CD276	4277	5270	614	805	39	1407	1669	439	327	1553	5215	720	838	424	736	1163	676	484	465	381	413	132	779	273	547	649	230	289	468	591	209	116	591
S100A8	82	2237	41	6	3	1153	596	468	235	1728	1450	969	3566	1388	684	17	44	39	30	51	4	1	151	48	7	21	10	6	4	0	1	4	10
CD80	162	404	41	68	10	98	436	60	37	147	47	19	12	23	33	55	55	23	44	28	21	19	51	10	28	51	26	11	35	16	12	34	33
CCL13	154	754	265	28	13	219	2013	173	88	368	266	45	90	72	82	111	44	40	30	32	12	32	16	7	39	13	19	16	28	9	18	8	15
BIRC5	594	3994	389	201	45	786	214	133	41	68	64	95	54	69	59	533	338	295	375	366	162	41	114	207	354	61	225	29	213	172	38	72	159
CD3G	74	115	14	15	15	127	141	248	184	219	263	333	161	190	219	13	17	4	25	14	9	12	11	1	9	14	7	2	11	10	3	3	12
ZAP70	188	202	43	70	13	214	274	491	226	405	555	381	321	369	181	88	160	42	156	69	85	46	150	18	123	150	80	47	71	57	42	88	206
ISG15	1864	8386	3097	1525	116	1535	2691	9	11	30	16	5	9	4	11	750	404	116	353	168	210	162	242	275	278	219	73	132	205	213	69	51	222
ZEB1	1268	605	159	244	11	313	488	59	9	68	57	5	37	99	26	326	238	151	250	168	200	99	398	317	269	456	223	264	187	156	244	34	331
CTSS	12248	8592	1119	2410	103	8486	16729	13	10	15	25	6	9	16	8	837	1283	345	1111	287	400	107	1569	151	1470	761	342	124	804	439	128	358	831
TNFRSF14	430	163	137	292	40	149	359	159	74	277	105	18	41	22	30	323	350	213	415	142	252	113	313	99	257	227	140	117	302	222	163	250	218
TNFRSF18	148	528	66	53	19	101	180	34	18	31	28	10	19	9	19	58	79	16	101	47	51	21	33	17	51	77	32	18	39	22	26	34	52
PVR	597	779	257	312	56	514	407	54	33	115	53	34	21	20	39	337	308	278	192	175	177	32	120	99	311	137	101	88	226	210	87	141	199
MMP9	2939	1655	99	1162	689	2832	1019	61	78	154	310	62	37	28	45	260	388	85	74	150	106	87	1469	119	166	1243	151	99	89	145	43	181	102
CD69	365	154	137	110	22	131	237	161	87	439	185	75	3227	73	38	148	97	53	111	66	106	49	203	31	127	92	64	27	72	24	29	54	89
PIK3CA	958	1828	223	225	38	617	545	142	67	130	387	62	69	101	121	231	193	149	114	116	89	30	169	53	219	136	63	79	114	103	59	78	120
TNFRSF4	18	19	9	14	10	10	13	50	20	114	107	45	27	36	32	4	6	3	6	24	1	7	5	4	4	6	8	2	5	2	2	5	4
PTGS2	200	568	61	31	5	228	90	7453	2897	77123	4936	7300	14929	1981	1174	127	47	38	31	18	13	37	48	20	33	25	30	8	13	23	15	34	34
BLK	12	21	12	10	17	16	21	16	13	11	20	6	4	5	10	6	6	2	10	6	6	2	9	4	7	7	3	2	5	5	2	2	6
IL1A	34	1887	36	12	13	227	88	7	4	10	9	7	8	3	3	19	7	12	11	2	3	3	12	4	3	6	2	2	2	6	1	11	5
CEACAM3	19	21	4	12	17	29	13	11	3	8	7	2	5	7	4	4	11	12	15	18	8	23	44	46	9	15	15	3	9	11	5	6	8
CMKLR1	485	596	86	295	25	438	807	7	3	8	5	2	8	4	4	70	178	24	181	80	71	54	210	21	102	156	93	53	94	46	49	25	93
ARG1	11	16	9	7	11	5	12	114	230	614	568	654	1025	277	238	3	7	9	5	5	1	0	3	7	4	3	2	3	5	0	3	1	2
S100A12	42	281	15	15	13	140	126	243	399	1119	666	905	1574	525	414	8	20	46	15	62	4	22	59	20	9	17	22	2	7	6	5	8	12
OAS3	1037	3373	1046	395	10	741	1089	6	6	8	9	1	8	5	6	374	134	106	212	69	112	37	82	67	71	89	67	30	131	150	17	30	172
TWIST1	107	37	24	22	9	16	45	209	263	509	239	386	618	352	151	32	30	24	28	48	3	55	111	11	18	58	66	3	27	11	11	0	53
CD84	605	497	117	259	24	617	1467	383	513	522	2017	306	432	192	270	90	166	43	138	70	59	54	305	32	95	161	52	41	79	40	25	46	94
PNOC	51	44	13	9	8	43	146	219	64	177	158	73	162	168	168	10	34	3	13	11	9	12	58	3	8	43	10	1	5	7	3	12	7
TNFRSF17	170	194	25	26	7	142	736	98	63	136	66	9	9	12	9	27	76	8	11	25	14	19	74	5	16	94	17	4	13	10	7	27	14
IL1B	228	191	45	36	8	207	109	35	25	25	40	13	26	15	19	56	101	118	57	16	21	18	65	10	21	55	46	2	11	14	5	10	16
BLM	190	527	89	51	33	243	89	371	63	150	308	191	148	293	230	176	122	137	134	53	65	14	71	72	101	41	54	18	719	58	20	75	70
CCL5	1160	728	262	192	43	1032	1266	147	235	594	551	262	938	373	194	441	471	67	664	142	180	25	782	122	227	314	78	92	173	140	86	202	283
KLRD1	74	44	18	17	20	29	36	58	57	153	161	98	221	126	62	14	23	12	44	12	10	12	17	9	11	7	7	2	7	7	5	8	8
CD8A	296	190	97	81	23	328	250	200	218	574	424	295	409	209	151	71	183	41	322	136	61	84	314	21	76	122	69	23	77	62	22	112	158
PIK3CD	209	1619	59	82	7	248	574	1146	686	2837	5747	768	1407	829	994	56	63	59	70	19	42	18	124	81	58	83	32	21	31	17	17	20	54
RUNX3	540	1158	373	146	14	238	543	868	824	2319	8119	1568	6440	5764	4801	226	230	377	201	114	219	47	294	53	143	239	95	39	87	73	54	106	493
CSF1R	117	86	28	58	10	55	131	415	392	1202	1144	887	1058	651	535	30	52	17	36	24	29	22	62	10	39	55	35	24	34	18	6	13	34
ADORA2A	101	93	29	58	13	111	239	72	19	130	82	1083	90	140	65	33	57	23	77	148	25	106	86	33	28	86	115	11	51	54	30	19	84
IFIT3	262	1536	360	123	9	242	579	12	18	35	27	10	15	12	6	154	121	18	163	33	49	16	59	112	48	58	15	14	22	24	18	25	58
CCL4	716	1838	116	157	13	533	633	630	554	2258	1719	2152	4963	1320	633	221	260	45	528	52	66	14	614	52	108	145	29	18	90	24	15	74	72
HLA-DOA	63	50	17	29	14	45	158	1044	1136	2750	6409	5029	1327	1441	2357	9	11	6	15	5	5	4	10	4	7	11	5	3	9	2	5	11	8
CX3CR1	107	33	11	91	10	59	360	281	165	400	402	103	107	81	154	9	33	7	9	13	11	8	11	4	12	18	11	22	7	6	8	4	14
IFI6	1650	7762	3358	3355	52	684	3897	245	449	736	1403	90	23	137	100	369	447	43	493	73	474	84	103	150	173	296	64	68	267	94	73	156	167
BRIP1	336	2128	100	123	16	264	174	183	39	240	204	184	320	170	58	215	208	184	172	108	109	70	82	78	115	47	137	24	145	138	35	88	122
CD47	5919	13295	4173	1195	229	2288	7235	254	260	1442	2749	2221	837	826	892	4599	1148	774	1531	791	650	111	764	331	999	553	497	315	1178	864	204	784	950
CCND1	5928	11452	1815	3800	116	3990	2660	174	106	983	1612	387	235	120	175	2551	2327	610	1180	973	580	124	428	345	944	929	476	284	771	817	249	267	1634
TNFRSF1B	871	476	288	330	133	714	668	206	157	796	1140	471	441	206	291	430	258	239	412	121	154	28	441	165	187	169	116	98	187	194	61	137	192
IRF9	2058	8416	1190	1103	236	1670	2743	32	10	16	10	5	13	6	11	913	1260	302	1004	333	612	134	500	221	828	596	270	262	541	358	232	696	637
SH2D1A	86	64	27	9	3	78	137	44	17	30	54	13	34	21	38	20	24	12	23	10	12	4	47	8	18	25	7	3	7	12	4	12	25
MAGEA1	9	29	12	6	12	17	10	63	124	91	107	263	119	81	62	8	5	4	7	4	1	14	6	3	5	1	3	0	3	5	1	7	1
CXCL8	4167	3176	1162	397	24	4650	687	104	35	96	138	85	126	116	80	728	1253	3038	887	255	65	46	1762	1782	238	352	193	60	112	107	14	86	136
IFITM2	1604	844	177	438	41	1198	1218	798	293	1295	1849	923	1546	557	486	157	138	101	138	166	145	40	117	38	211	145	85	116	95	154	47	51	193
CD38	206	347	54	50	12	275	501	164	145	450	285	326	506	252	127	40	99	27	76	85	32	19	188	10	43	114	19	14	29	13	14	36	43
CD27	282	334	54	42	11	249	819	155	74	213	135	48	82	89	62	42	161	22	90	24	16	4	185	8	44	116	17	9	23	13	12	50	47
NECTIN2	3416	2230	945	1205	298	1686	2357	69	79	259	157	104	242	154	73	987	775	567	552	366	416	57	440	175	600	439	256	179	414	509	103	401	493
MLANA	8	27	5	10	3	3	21	33	27	40	33	6	14	14	9	5	6	3	3	2	0	7	3	2	0	1	6	1	2	1	4	3	3
ITGB2	1495	849	278	308	41	1537	3112	1073	1534	1865	973	1551	1908	1001	471	196	207	80	178	68	90	45	497	88	128	216	68	58	93	77	42	49	129
TLR3	118	230	29	36	6	212	335	213	121	206	286	41	78	61	90	18	22	4	18	7	8	2	12	1	9	10	6	3	8	5	5	5	8
CXCL5	474	186	37	6	4	4670	478	748	473	1596	1131	578	1090	619	299	32	204	268	38	1488	2	18	191	3819	19	246	45	9	6	3	3	1	31
STAT3	5932	6477	966	2122	103	4270	7724	593	238	1482	1044	1193	1042	480	404	1924	2154	796	1154	805	1023	256	1389	384	1214	1137	719	466	894	919	403	707	1022
AKT1	1777	2729	609	602	179	1035	1300	1209	917	2562	2992	1428	2948	1813	839	1052	764	570	590	646	663	163	524	315	764	493	515	317	485	574	251	327	678
ITGAX	748	608	160	338	39	595	786	114	120	298	223	314	268	116	142	205	343	140	313	135	105	81	767	401	187	280	123	56	117	46	66	47	112
CTLA4	174	506	55	64	10	202	287	81	61	139	1836	243	83	167	96	76	104	23	117	56	31	30	76	10	34	75	24	12	38	28	17	37	52
MAGEC2	14	12	12	9	12	10	23	438	512	2214	1676	1201	2331	1287	758	14	10	4	2	9	5	14	4	4	2	1	4	0	2	3	3	1	2
PDGFA	3256	378	88	219	11	115	131	155	102	392	365	114	133	94	91	119	43	25	33	34	43	23	58	7	70	65	43	34	74	18	20	17	59
FCGR1A	388	278	101	176	30	483	772	127	212	710	1099	557	800	545	296	47	92	13	103	25	20	4	244	29	30	80	11	22	25	14	19	15	27
MLH1	992	1036	229	256	49	716	792	27	33	134	96	68	164	29	38	425	272	209	273	222	229	101	271	161	227	212	186	141	223	163	91	148	228
KLRK1	97	97	19	31	2	106	156	207	120	942	693	1030	2259	430	315	29	59	14	105	25	31	10	68	6	24	44	9	1	22	15	2	14	30
TBX21	35	50	22	18	2	41	114	6	30	94	45	32	166	17	20	11	12	5	30	11	8	10	27	7	6	20	16	4	7	7	3	5	13
TNFRSF1A	2115	6716	506	539	67	1601	1995	289	185	313	647	198	646	124	124	660	566	440	400	274	325	132	654	249	477	436	238	253	466	296	232	225	565
FOXP3	127	111	64	52	10	87	122	18	29	42	143	14	9	19	16	34	42	10	37	27	16	29	11	3	16	38	17	8	12	13	7	7	41
MYC	5556	8588	2839	2348	279	2521	611	19	50	127	468	82	12	31	29	5067	5333	1780	3445	4139	930	313	1384	915	2011	905	1669	284	1928	1926	631	950	1948
TIE1	304	401	75	106	33	304	377	316	677	1289	4472	813	313	613	342	111	85	34	56	34	61	25	158	36	64	88	36	34	38	29	50	15	49
SLAMF7	466	782	62	62	23	484	1822	916	1192	4367	2046	1522	3359	1375	835	50	145	14	86	18	22	6	213	13	41	170	21	7	47	8	8	45	40
MELK	1430	8515	228	307	53	842	191	90	86	134	326	78	61	44	42	475	207	257	200	148	106	22	127	111	330	81	103	36	207	105	29	67	167
GBP1	1990	8945	537	284	34	1370	1700	26	23	73	95	20	24	13	16	764	633	134	839	133	149	42	542	71	205	385	98	87	228	146	63	123	300
CD8B	112	60	30	49	0	69	87	50	43	48	71	27	23	27	25	22	64	20	60	64	28	46	42	6	25	33	48	11	23	30	10	18	38
CD79B	91	122	44	36	27	107	254	138	144	482	622	87	56	51	82	28	87	40	69	40	39	34	107	5	59	73	27	12	17	10	16	35	43
CD14	1610	3008	389	632	150	2341	1536	92	41	76	585	148	154	146	159	256	343	118	212	121	111	37	670	115	212	311	101	106	111	68	78	111	200
CXCL13	81	850	65	21	6	299	255	74	174	126	24	125	26	67	15	33	79	7	132	23	16	0	246	7	45	64	3	0	10	7	1	12	15
MX1	2422	16184	8466	2760	243	1277	6800	955	492	2147	2127	577	1033	547	732	2332	654	119	874	121	647	345	218	464	580	417	160	248	478	166	153	281	392
TNFSF4	422	141	54	90	8	143	267	1473	1508	4527	3711	2744	3117	2278	1056	25	22	12	26	7	13	4	11	5	21	20	4	9	11	10	3	4	21
CSF2RB	199	270	60	61	7	246	497	50	29	87	97	43	59	35	47	33	71	22	37	18	17	14	121	29	40	100	34	8	16	12	16	16	32
RORC	109	28	19	29	9	156	264	589	155	1396	1107	1179	1209	493	688	8	15	10	6	7	31	13	9	4	6	2	12	5	18	17	5	27	8
FCAR	37	30	21	6	1	40	53	126	154	370	385	441	507	279	133	5	13	16	8	15	0	13	88	9	7	17	14	1	2	4	1	2	4
CCL7	24	26	22	7	2	53	33	20	11	41	37	6	8	9	14	5	5	2	2	2	1	1	2	0	1	1	0	0	0	2	2	0	4
KLRB1	339	42	41	32	9	136	269	9	14	23	15	4	9	6	2	34	61	11	16	12	32	2	84	3	26	56	22	8	27	27	12	25	43
PTPN11	2166	5054	803	559	51	2519	2280	398	135	412	134	82	99	98	32	1341	699	616	670	478	280	86	323	220	618	337	278	213	329	362	131	149	429
BCL2	753	229	44	84	21	164	324	685	1784	4733	5866	1673	9823	2158	819	45	86	22	81	35	42	25	44	14	50	61	37	14	29	39	16	72	48
CD2	99	85	24	25	8	110	290	935	587	758	669	754	1397	873	472	9	36	5	26	6	7	2	26	2	20	22	13	8	23	10	4	11	19
HLA-DRA	8215	13823	1676	2314	65	20607	28273	177	72	122	150	162	185	133	97	870	1075	191	1398	230	313	35	1246	58	496	878	138	133	375	184	104	379	739
LAG3	133	455	35	34	9	211	141	81	117	131	119	11	53	23	54	33	72	14	118	19	26	5	55	4	18	46	19	4	21	15	8	25	28
MSH2	939	2173	348	190	26	589	434	31	9	108	40	67	35	54	22	463	245	153	224	180	133	34	123	91	195	100	101	47	136	123	42	64	130
KIR3DL1	42	64	31	66	5	39	40	35	23	29	18	15	26	12	11	4	10	11	33	68	7	74	9	8	12	31	65	2	14	21	11	8	27
TLR8	42	83	18	27	3	67	200	18	13	34	34	13	20	21	8	5	12	6	11	14	2	28	19	5	9	22	20	2	10	5	3	3	8
CD4	480	550	144	179	46	765	1341	32	15	22	18	13	15	26	14	96	95	17	61	34	35	11	126	12	56	109	23	24	44	32	13	32	68
CXCL10	600	3698	151	98	6	301	844	55	90	109	495	62	27	55	122	129	102	7	336	23	13	1	26	6	23	51	11	1	35	14	3	17	84
ICAM1	2001	1499	351	263	11	1882	5272	204	307	391	319	280	243	184	225	312	312	160	453	150	114	50	420	72	169	351	97	45	142	54	63	67	268
CX3CL1	179	243	50	38	37	133	414	51	43	294	170	22	9	20	11	52	98	27	88	60	85	27	24	8	29	57	43	30	30	35	25	68	34
FASLG	47	77	13	18	4	62	74	45	72	130	129	23	59	27	36	14	17	4	32	5	8	4	9	3	7	12	10	6	5	8	6	9	7
OAS2	750	6324	1165	414	9	685	2103	642	471	1654	1410	1615	1055	913	691	226	129	14	95	30	71	29	72	36	47	89	25	18	61	31	15	26	48
CXCR6	124	110	29	39	1	165	167	278	209	471	865	348	452	325	260	18	52	11	65	22	20	16	73	5	17	30	22	3	21	19	2	12	34
HIF1A	4305	14129	1006	708	29	3011	5680	19	7	15	20	2	12	4	5	762	677	486	350	304	524	127	1483	646	349	722	202	146	221	250	119	133	540
NCAM1	101	101	34	26	8	29	44	41	13	64	75	16	29	24	35	42	58	16	45	33	36	30	15	9	33	48	50	58	33	19	38	15	47
GZMK	186	41	48	90	14	253	275	485	470	1914	1805	2192	1030	441	406	26	69	13	51	23	14	11	134	8	53	64	20	4	30	20	6	15	53
POLR2A	3271	8328	679	908	607	2500	3200	83	61	148	85	126	140	65	76	1214	956	492	593	420	581	170	811	374	769	567	381	466	473	780	194	770	575
NCR1	22	48	15	9	6	42	57	6	6	15	25	5	16	4	5	6	11	7	12	6	6	1	16	10	8	3	5	1	8	9	5	11	5
NBN	1771	3691	738	429	14	980	1503	28	13	20	18	40	200	39	27	1236	737	712	489	524	315	57	525	191	446	341	295	109	228	234	147	94	550
OAS1	2075	4050	2226	1190	35	1772	1702	149	57	225	323	46	262	93	24	1766	443	246	465	317	289	149	166	71	295	222	196	97	528	459	74	104	323
IFITM1	12959	18441	4266	2779	31	8113	4980	49	37	101	81	20	17	18	17	1244	1477	1030	1220	965	191	57	964	101	1311	509	230	152	681	1086	72	195	1724
CD19	19	46	16	8	8	21	74	44	15	3	35	30	19	12	9	15	40	14	17	21	22	28	66	8	41	43	24	7	7	8	7	32	29
FAS	420	512	114	108	23	328	682	457	73	459	621	134	1001	169	260	143	109	44	113	36	87	29	138	114	64	133	43	48	63	74	38	66	66
CD6	115	107	48	71	8	85	154	321	639	2069	2570	3071	4141	2348	1477	62	122	33	86	84	54	45	110	13	78	137	54	16	59	37	32	39	78
STAT1	2020	11984	1759	882	48	3848	4334	11	12	76	13	2	9	20	1	543	840	202	883	187	157	47	383	97	306	405	96	96	307	210	58	192	453
MSH6	339	933	115	76	10	211	182	105	101	270	133	42	80	45	52	133	85	67	85	56	45	14	63	32	73	54	47	23	49	43	10	25	77
IL2RA	199	543	122	62	8	340	284	361	139	236	284	187	452	782	426	94	57	14	50	43	24	16	130	6	18	38	26	11	30	19	8	57	42
TPSAB1	3855	1070	591	537	6	1429	3032	1129	1171	3117	18658	818	1050	2562	2560	570	371	113	177	77	98	114	331	32	633	370	134	221	104	138	102	58	273
HLA-DQA1	4277	5636	678	6	230	6928	18696	545	213	274	609	615	633	392	360	642	1581	2	574	454	6	1	1226	4	669	792	496	3	853	170	1	4	6
PRR5	344	461	84	114	31	117	160	32	26	46	22	10	12	13	13	124	195	105	166	107	91	64	122	29	77	82	175	32	87	132	22	114	143
GZMM	45	20	21	17	9	26	50	2961	1085	1828	790	1564	988	946	1091	13	34	8	23	51	14	40	45	15	16	26	41	8	11	18	10	8	31
HLA-E	11746	21311	2174	2815	756	14923	15307	5871	4723	8453	2117	2899	2601	1776	3389	3097	4140	1374	2665	819	1338	175	3079	647	2452	2008	762	637	1950	1298	450	1549	1545
PF4	46	31	5	17	19	35	110	3583	2339	8653	5400	6936	6633	3105	2000	6	11	6	47	13	14	18	4	6	3	20	32	1	23	8	6	16	10
HLA-DRB1	16525	7659	1593	2253	592	7976	34248	1221	1303	4495	7463	3648	7644	3526	1703	1619	3666	163	2415	1275	208	88	2157	24	1428	2138	804	64	2099	711	25	1418	465
UBB	32547	60139	6522	8294	384	26507	32620	20	31	9	26	8	22	24	7	7838	5692	2881	2775	2395	3394	223	3760	1225	3257	2570	1513	1217	2680	2748	552	1204	2706
OAZ1	8244	12828	2489	1677	57	11287	12584	149	185	329	255	164	290	129	162	2558	1140	1244	980	584	499	43	964	205	1209	684	426	239	726	656	133	229	1099
TBC1D10B	527	344	77	173	21	304	273	23	31	106	67	68	84	64	33	79	91	42	42	55	27	29	51	29	67	41	48	18	46	28	9	28	73
FCGR3B	1805	5735	405	520	22	3675	5321	104	105	308	197	130	406	162	77	133	166	41	172	106	30	22	403	184	87	170	36	24	58	31	13	28	101
CXCL2	2769	448	537	630	91	1867	3300	1020	594	724	2101	464	1671	412	496	1152	384	336	2118	445	438	97	878	637	495	651	933	46	887	465	66	1399	612
STK11IP	160	363	35	67	8	81	96	5469	6840	18710	18956	12447	15462	10255	3483	61	34	13	38	22	37	5	20	14	34	21	21	9	27	21	5	22	24
