# Supplementary material for: Gamma Knife stereotactic radiotherapy combined with tislelizumab as later-line therapy in pMMR/MSS/MSI-L metastatic colorectal cancer: a phase II trial analysis
Source: eLife. 2025 Jun 26;14:RP103559. doi: 10.7554/eLife.103559 (PMC12201948; doi:10.7554/eLife.103559)
Supplement: Supplementary file 1. [file elife-103559-supp1.xlsx]

## Sheet: Univariate Cox Hazards Model
gene	HR	L95CI	H95CI	pvalue
SDHA	0.998707	0.994891	1.00254	0.507703
ITGAL	0.989465	0.965959	1.01354	0.38791
TNFSF13B	0.999796	0.952247	1.04972	0.993441
CTSW	0.994952	0.982363	1.0077	0.436002
PTGER4	1.00191	0.968326	1.03665	0.912837
GNLY	1.13406	0.97639	1.3172	0.0995286
C1QB	0.9999	0.996098	1.00372	0.95902
PSMB10	1.00045	0.992697	1.00826	0.910304
HSD11B1	0.778825	0.470533	1.28911	0.330932
IRF1	0.999914	0.991342	1.00856	0.984336
CXCR2	1.00022	0.983191	1.01754	0.980301
PDCD1LG2	0.949602	0.831876	1.08399	0.443823
BTLA	0.93026	0.820405	1.05482	0.259528
C1QA	0.999672	0.989765	1.00968	0.948554
GZMA	1.0047	0.987557	1.02214	0.593387
TDO2	0.994769	0.973156	1.01686	0.639815
HERC6	0.992741	0.974955	1.01085	0.429622
ABCF1	0.996943	0.990798	1.00313	0.331835
TGFB1	1.00104	0.997817	1.00428	0.526514
LYZ	0.999517	0.997961	1.00108	0.543624
ITGA1	0.994247	0.985035	1.00354	0.224384
CD28	0.939073	0.797197	1.1062	0.451918
IL17A	0.366695	0.0577801	2.32718	0.287295
IL6	0.950085	0.871398	1.03588	0.2457
GUSB	1.00035	0.996058	1.00465	0.874272
CD274	0.994043	0.978571	1.00976	0.455395
CXCR3	1.24907	0.946875	1.64772	0.115556
AXL	0.994647	0.985564	1.00381	0.251443
IL15	1.02615	0.950706	1.10757	0.507676
FPR1	0.96581	0.830695	1.1229	0.650962
TNFSF9	0.952925	0.87844	1.03372	0.245558
IL4	0.94426	0.494856	1.80179	0.861885
PDCD1	0.993902	0.913357	1.08155	0.887199
IFI35	1.00456	0.990824	1.01849	0.517172
CD3D	1.01445	0.983043	1.04685	0.371344
CD74	1.00015	0.999861	1.00043	0.312498
ICOS	0.986586	0.954281	1.01998	0.426598
KIR2DL3	1.28163	0.91821	1.78889	0.144722
SELL	0.946421	0.849329	1.05461	0.318701
IL10RA	0.998877	0.985913	1.01201	0.86616
CD1C	0.87379	0.665828	1.14671	0.330628
G6PD	0.993142	0.979388	1.00709	0.333519
PECAM1	0.997988	0.989664	1.00638	0.637531
IL7R	0.990209	0.966908	1.01407	0.41805
BRCA1	0.976783	0.93749	1.01772	0.26215
CCR5	0.984987	0.944903	1.02677	0.475485
EOMES	0.97639	0.843822	1.12978	0.748262
EGFR	0.990853	0.972159	1.00991	0.344361
SPIB	0.966843	0.892813	1.04701	0.406743
IL21R	1.00636	0.969625	1.04448	0.738339
CD40	0.998254	0.990111	1.00646	0.675726
TFRC	0.998894	0.996585	1.00121	0.348729
TLR7	0.979109	0.914375	1.04843	0.545206
HLA.DMB	1.00401	0.993331	1.01481	0.463088
IFIH1	0.994832	0.980696	1.00917	0.477941
IL2RG	0.994576	0.975811	1.0137	0.575707
IFIT2	0.998905	0.953877	1.04606	0.962884
ENTPD1	0.996621	0.988295	1.00502	0.42902
LY9	0.98172	0.932733	1.03328	0.479931
HLA.DPA1	1.00295	0.993559	1.01243	0.53949
MTOR	1.00207	0.985744	1.01867	0.804913
FCGR2B	0.987692	0.963769	1.01221	0.322214
HLA.DQA2	0.853369	0.618903	1.17666	0.333331
ITGAE	0.999708	0.978391	1.02149	0.978799
HAVCR2	0.973757	0.911572	1.04018	0.429625
IRF4	1.00061	0.995342	1.0059	0.821771
TRAT1	1.00919	0.924503	1.10163	0.83795
CD70	0.977314	0.922119	1.03581	0.439127
NOS2	0.998487	0.988665	1.00841	0.763982
LCK	0.966429	0.924479	1.01028	0.131529
IFNG	1.07292	0.884088	1.30209	0.476072
CDKN2A	0.919687	0.777624	1.0877	0.328096
DLL4	0.989765	0.965273	1.01488	0.420964
CD3E	1.00876	0.987268	1.03073	0.427223
CD79A	0.992579	0.965052	1.02089	0.603725
CCR2	0.995674	0.961577	1.03098	0.807328
FCRL2	0.919458	0.786599	1.07476	0.291626
EIF2AK2	0.999251	0.986702	1.01196	0.907501
NFKBIA	0.999813	0.998059	1.00157	0.834739
RB1	0.997318	0.989506	1.00519	0.503294
CD68	1.0017	0.997544	1.00588	0.423054
KIR3DL2	1.00308	0.968184	1.03924	0.86468
MS4A2	0.94687	0.83061	1.0794	0.414053
CTAG1B	0.979194	0.909661	1.05404	0.575835
ADM	0.995181	0.983047	1.00746	0.44023
HLA.DMA	0.999098	0.996503	1.0017	0.496717
GZMB	0.997936	0.989055	1.0069	0.650608
CCL20	0.999342	0.996127	1.00257	0.688716
CSF3R	1.00004	0.996792	1.0033	0.980324
MS4A1	0.990497	0.961925	1.01992	0.522573
HLA.DOB	0.939882	0.827865	1.06706	0.338284
S100A9	0.997448	0.991738	1.00319	0.383068
CCL18	0.979322	0.942459	1.01763	0.285799
MAGEA12	0.982838	0.939904	1.02773	0.447497
CXCL12	0.997761	0.98671	1.00893	0.693173
NT5E	0.995366	0.983987	1.00688	0.42853
CXCL11	1.00315	0.996849	1.00948	0.328135
CYBB	0.995732	0.983718	1.00789	0.489806
CD86	0.993632	0.83943	1.17616	0.940813
TNF	1.09544	0.981009	1.22322	0.105371
IFIT1	0.986339	0.948682	1.02549	0.488582
PTPRC	0.984274	0.954041	1.01547	0.319339
CCR4	0.971116	0.859187	1.09763	0.639001
CPA3	0.989894	0.946252	1.03555	0.658838
FGF13	0.929488	0.794551	1.08734	0.360895
FUT4	1.00024	0.992965	1.00756	0.949004
ICOSLG	0.992655	0.975697	1.00991	0.401732
IL2	0.977715	0.891012	1.07285	0.634296
CD40LG	0.933256	0.775644	1.12289	0.464247
CD209	1.0607	0.992675	1.13338	0.0814122
CCL22	0.993494	0.972721	1.01471	0.544898
IFI27	0.999889	0.999289	1.00049	0.715867
VEGFA	0.999412	0.99745	1.00138	0.557081
BRCA2	1.0087	0.992412	1.02525	0.297045
CD163	0.978843	0.903043	1.06101	0.603073
NKG7	1.00363	0.995943	1.01137	0.355755
CCL2	0.996947	0.97304	1.02144	0.805
STAT4	0.969742	0.916187	1.02643	0.28913
TLR9	0.995406	0.979169	1.01191	0.583213
IL12RB2	0.986586	0.932688	1.0436	0.637554
PRF1	0.995193	0.982067	1.00849	0.476859
CD44	1.00026	0.999809	1.00072	0.254996
IL2RB	1.01156	0.992446	1.03105	0.237605
ITGAM	0.969765	0.887881	1.0592	0.495167
CXCL9	1.00188	0.999652	1.00411	0.0981799
TBP	0.988381	0.96045	1.01712	0.424256
CD244	1.02504	0.874551	1.20143	0.760115
CXCR4	0.995989	0.989425	1.0026	0.233431
PTEN	0.99919	0.996589	1.0018	0.542412
TNFRSF9	0.990881	0.952815	1.03047	0.646696
MRC1	0.980536	0.941993	1.02065	0.336691
CXCL1	0.999582	0.99848	1.00068	0.456974
GZMH	0.991312	0.969818	1.01328	0.435254
SNAI1	0.992607	0.976842	1.00863	0.363632
MS4A4A	0.988906	0.964035	1.01442	0.390694
TCL1A	0.968892	0.898279	1.04506	0.413055
TNFSF18	0.962981	0.874141	1.06085	0.44497
IDO1	1.0028	0.998845	1.00677	0.165584
CD247	0.996651	0.983225	1.01026	0.627862
VTCN1	0.988031	0.955103	1.02209	0.486265
MKI67	1.00065	0.996671	1.00465	0.748372
CCL21	1.00205	0.990362	1.01387	0.732766
TIGIT	0.987041	0.959436	1.01544	0.36744
ATM	1.00013	0.990972	1.00937	0.978021
CD48	1.00165	0.993328	1.01004	0.698479
PSMB9	1.004	0.999107	1.00892	0.109175
LILRB2	0.989381	0.963642	1.01581	0.42733
CSF2	0.970771	0.862123	1.09311	0.624241
PDGFB	0.994558	0.966319	1.02362	0.710383
IL18	0.99754	0.98125	1.0141	0.769332
IL10	0.959752	0.85372	1.07895	0.491616
TNFSF10	1.00545	0.995748	1.01525	0.271912
SIGLEC5	0.974618	0.91086	1.04284	0.456384
VCAM1	0.988966	0.96873	1.00963	0.292882
HDC	1.12452	0.90314	1.40016	0.294102
MAGEA4	0.964109	0.862085	1.07821	0.52186
ANGPT2	0.903934	0.792751	1.03071	0.13149
PMS2	0.983995	0.956793	1.01197	0.259282
TAP1	1.00258	0.998818	1.00635	0.179405
RAD51	0.94066	0.835857	1.0586	0.310101
CD276	0.995807	0.989988	1.00166	0.160022
S100A8	0.980196	0.925963	1.03761	0.490971
CD80	0.97761	0.899525	1.06247	0.593922
CCL13	0.967263	0.906156	1.03249	0.317484
BIRC5	1.00255	0.995348	1.0098	0.488983
CD3G	0.985604	0.951287	1.02116	0.422553
ZAP70	0.993849	0.97984	1.00806	0.394299
ISG15	0.999744	0.99662	1.00288	0.872842
ZEB1	0.999922	0.990837	1.00909	0.986704
CTSS	1.00075	0.998278	1.00322	0.55316
TNFRSF14	1.00344	0.992515	1.01449	0.538358
TNFRSF18	1.03388	0.985247	1.08491	0.175309
PVR	0.998656	0.986667	1.01079	0.827279
MMP9	0.999919	0.997168	1.00268	0.954241
CD69	0.986697	0.957835	1.01643	0.376643
PIK3CA	0.979171	0.947306	1.01211	0.212426
TNFRSF4	0.960453	0.849942	1.08533	0.517643
PTGS2	0.981906	0.92477	1.04257	0.550513
BLK	1.05862	0.854886	1.31091	0.601428
IL1A	1.00667	0.853079	1.18792	0.937238
CEACAM3	1.03443	0.943549	1.13406	0.470634
CMKLR1	1.01177	0.993326	1.03055	0.212589
ARG1	0.975831	0.886077	1.07468	0.619196
S100A12	0.9809	0.919221	1.04672	0.560559
OAS3	0.999888	0.993074	1.00675	0.974458
TWIST1	0.990723	0.970482	1.01139	0.376192
CD84	0.992096	0.97536	1.00912	0.360604
PNOC	0.962377	0.87946	1.05311	0.404152
TNFRSF17	0.942876	0.821239	1.08253	0.403896
IL1B	0.995884	0.959955	1.03316	0.825875
BLM	0.99231	0.972946	1.01206	0.442628
CCL5	1.00049	0.994868	1.00614	0.864703
KLRD1	0.988147	0.946602	1.03152	0.586392
CD8A	1.0013	0.989498	1.01324	0.829814
PIK3CD	0.983203	0.941407	1.02685	0.444677
RUNX3	0.993063	0.983232	1.00299	0.170228
CSF1R	0.987417	0.940639	1.03652	0.609095
ADORA2A	1.00672	0.98364	1.03034	0.571383
IFIT3	1.00348	0.989473	1.01768	0.628495
CCL4	0.998602	0.994572	1.00265	0.49789
HLA.DOA	0.995517	0.975166	1.01629	0.669828
CX3CR1	0.914316	0.62086	1.34648	0.650125
IFI6	0.998981	0.993257	1.00474	0.728097
BRIP1	0.999211	0.982376	1.01633	0.92744
CD47	0.999859	0.998594	1.00112	0.826788
CCND1	1.00012	0.998332	1.00191	0.894438
TNFRSF1B	1.00083	0.989488	1.0123	0.886902
IRF9	1.00161	0.998021	1.00521	0.380182
SH2D1A	0.928409	0.804367	1.07158	0.310024
MAGEA1	0.968812	0.895935	1.04762	0.427136
CXCL8	0.999613	0.998001	1.00123	0.638763
IFITM2	0.985369	0.961479	1.00985	0.239201
CD38	0.98467	0.955823	1.01439	0.308547
CD27	0.989232	0.960375	1.01896	0.473528
NECTIN2	1.0001	0.995525	1.0047	0.964565
MLANA	0.923238	0.750885	1.13515	0.44871
ITGB2	0.994684	0.980842	1.00872	0.455962
TLR3	0.966007	0.880615	1.05968	0.463923
CXCL5	0.990377	0.972617	1.00846	0.294931
STAT3	0.999595	0.996969	1.00223	0.762722
AKT1	0.996981	0.992423	1.00156	0.195893
ITGAX	0.99963	0.991831	1.00749	0.926211
CTLA4	0.994663	0.967615	1.02247	0.703606
MAGEC2	0.979382	0.761703	1.25927	0.870955
PDGFA	0.963172	0.91213	1.01707	0.176788
FCGR1A	0.992625	0.974855	1.01072	0.421932
MLH1	1.00141	0.991475	1.01145	0.781389
KLRK1	0.99319	0.974006	1.01275	0.492269
TBX21	1.0217	0.911656	1.14502	0.712015
TNFRSF1A	0.997239	0.989719	1.00482	0.474066
FOXP3	1.00776	0.915761	1.10899	0.874303
MYC	1.00034	0.999634	1.00104	0.346222
TIE1	0.969353	0.906356	1.03673	0.36394
SLAMF7	0.995437	0.980378	1.01073	0.556555
MELK	0.998685	0.986817	1.0107	0.829171
GBP1	1.00232	0.997754	1.0069	0.319913
CD8B	1.03705	0.950037	1.13203	0.41584
CD79B	0.980351	0.934956	1.02795	0.411994
CD14	0.998835	0.989257	1.0085	0.812502
CXCL13	0.996045	0.977048	1.01541	0.686714
MX1	0.999341	0.996212	1.00248	0.680145
TNFSF4	0.977267	0.836311	1.14198	0.772313
CSF2RB	0.98049	0.921467	1.04329	0.533944
RORC	0.921116	0.743138	1.14172	0.453197
FCAR	0.970126	0.893331	1.05352	0.471026
CCL7	0.640416	0.250319	1.63844	0.352475
KLRB1	0.972542	0.889413	1.06344	0.541377
PTPN11	0.999819	0.995974	1.00368	0.926625
BCL2	0.997106	0.986214	1.00812	0.60499
CD2	0.993957	0.973452	1.01489	0.568704
HLA.DRA	1.00088	0.99831	1.00345	0.503361
LAG3	1.00482	0.976905	1.03353	0.738106
MSH2	1.00047	0.990526	1.01051	0.926591
KIR3DL1	1.05375	0.991484	1.11992	0.0920354
TLR8	0.99875	0.857798	1.16286	0.987141
CD4	0.99757	0.963912	1.0324	0.889479
CXCL10	1.01118	0.997111	1.02545	0.119891
ICAM1	0.999032	0.9896	1.00855	0.841411
CX3CL1	1.02378	0.975505	1.07444	0.340305
FASLG	0.985298	0.922273	1.05263	0.66055
OAS2	0.99223	0.973055	1.01178	0.433332
CXCR6	0.990866	0.96991	1.01228	0.400166
HIF1A	0.998523	0.994479	1.00258	0.475318
NCAM1	1.04144	0.9498	1.14193	0.387554
GZMK	0.99116	0.968491	1.01436	0.451951
POLR2A	1.00079	0.997173	1.00443	0.667979
NCR1	1.09817	0.819319	1.47194	0.530925
NBN	0.999524	0.995822	1.00324	0.801554
OAS1	0.999563	0.996422	1.00271	0.785266
IFITM1	1.00002	0.998485	1.00155	0.984413
CD19	0.965731	0.858004	1.08698	0.563382
FAS	0.98476	0.956145	1.01423	0.307355
CD6	0.992729	0.971197	1.01474	0.514221
STAT1	1.00101	0.998297	1.00374	0.46468
MSH6	0.984361	0.947426	1.02274	0.419193
IL2RA	0.98433	0.949649	1.02028	0.388133
TPSAB1	0.994987	0.984868	1.00521	0.335293
HLA.DQA1	1.00081	0.997254	1.00437	0.656945
PRR5	1.02665	0.995043	1.05927	0.0992492
GZMM	0.995995	0.982591	1.00958	0.561621
HLA.E	0.999347	0.997967	1.00073	0.35463
PF4	0.998461	0.993325	1.00362	0.558395
HLA.DRB1	0.999974	0.998913	1.00104	0.96165
UBB	0.999875	0.999255	1.0005	0.692602
OAZ1	0.999584	0.997504	1.00167	0.69515
TBC1D10B	0.985688	0.917891	1.05849	0.691761
FCGR3B	0.995256	0.979168	1.01161	0.567339
CXCL2	1.00264	0.999518	1.00577	0.0976414
STK11IP	0.993068	0.917431	1.07494	0.863359

## Sheet: Multivariate Cox Hazard model
gene	HR	L95CI	H95CI	pvalue
SDHA	0.892154	8.46687e-39	9.40061e+37	0.997962
ITGAL	2.10277	5.77134e-67	7.66141e+66	0.992416
TNFSF13B	0.215262	0	Inf	0.998251
CTSW	0.000960183	1.40821e-61	6.54699e+54	0.918545
PTGER4	0.0346346	0	Inf	0.994335
GNLY	1.0045e+09	0	Inf	0.988654
C1QB	3.66213	5.12855e-115	2.615e+115	0.992324
PSMB10	7.65939	3.49848e-110	1.67691e+111	0.987469
HSD11B1	1.75957e+12	0	Inf	0.952963
IRF1	0.0943358	4.84512e-102	1.83674e+99	0.984013
CXCR2	0.694071	0	Inf	0.99965
PDCD1LG2	4.96219e+11	3.52739e-247	6.9806e+269	0.929242
BTLA	2.48026e-07	0	Inf	0.980074
C1QA	0.113726	7.70058e-300	1.67955e+297	0.995048
GZMA	2.76792	0	Inf	0.997876
TDO2	0.95342	1.53634e-261	5.91673e+260	0.999876
HERC6	1.23113	5.24976e-84	2.88716e+83	0.998306
ABCF1	1	1.63305e-34	6.1235e+33	1
TGFB1	0.993497	4.02774e-29	2.4506e+28	0.999844
LYZ	1	6.26349e-10	1.59655e+09	1
ITGA1	1.0036	9.0518e-89	1.11273e+88	0.999972
CD28	0.844974	2.2321e-16	3198694601304780	0.992656
IL17A	1	1.2418e-57	8.05283e+56	1
IL6	1	0	Inf	1
GUSB	1	2.55045e-117	3.92088e+116	1
CD274	1	2.31937e-108	4.31152e+107	1
CXCR3	1.12355	0	Inf	0.999944
AXL	1	1.80843e-24	5.52966e+23	1
IL15	1	0	Inf	1
FPR1	1.04037	0	Inf	0.999983
TNFSF9	0.933785	4.19399e-226	2.07906e+225	0.999794
IL4	1	2.06245e-56	4.8486e+55	1
PDCD1	7467.02	0	Inf	0.99432
IFI35	1	0	Inf	1
CD3D	1	0	Inf	1
CD74	1	2.00513e-10	4.98722e+09	1
ICOS	1	5.4812e-254	1.82442e+253	1
KIR2DL3	0.0526678	0	Inf	0.999787
SELL	1	0	Inf	1
IL10RA	1	1.02340367126001e-312	Inf	1
CD1C	1	0	Inf	1
G6PD	1.03995	2.94452e-49	3.67292e+48	0.999452
PECAM1	1	3.02735e-182	3.30322e+181	1
IL7R	1	2.42179e-278	4.12918e+277	1
BRCA1	1	0	Inf	1
CCR5	1	0	Inf	1
EOMES	0.430223	0	Inf	0.999778
EGFR	1	4.58702e-165	2.18006e+164	1
SPIB	1	7.63878e-214	1.30911e+213	1
IL21R	1	0	Inf	1
CD40	1.02572	1.83902e-11	5.72102e+10	0.998395
TFRC	1	2.07903e-21	4.80995e+20	1
TLR7	2.2827	7.25603e-147	7.18121e+146	0.996174
HLA.DMB	1	0	Inf	1
IFIH1	1	8.3926e-46	1.19153e+45	1
IL2RG	0.891963	0	Inf	0.99976
IFIT2	1	0	Inf	1
ENTPD1	1	0.000119333	8379.89	1
LY9	1	9.45569e-204	1.05756e+203	1
HLA.DPA1	1	0	Inf	1
MTOR	1	5.80573e-301	1.72244e+300	1
FCGR2B	1	7.34606e-247	1.36127e+246	1
HLA.DQA2	1	0	Inf	1
ITGAE	1	0	Inf	1
HAVCR2	1	0	Inf	1
IRF4	1	4.5324e-247	2.20634e+246	1
TRAT1	1	0	Inf	1
CD70	1	0	Inf	1
NOS2	1	7.68206e-172	1.30173e+171	1
LCK	1	0	Inf	1
IFNG	1	0	Inf	1
CDKN2A	1	0	Inf	1
DLL4	1	1.97418e-225	5.0654e+224	1
CD3E	1	0	Inf	1
CD79A	1	0	Inf	1
CCR2	1	5.13778e-16	1946366873812380	1
FCRL2	1	0	Inf	1
EIF2AK2	1	0	Inf	1
NFKBIA	1	1.28859e-49	7.76043e+48	1
RB1	1	9.22834e-13	1.08362e+12	1
CD68	1	1.48302e-47	6.74299e+46	1
KIR3DL2	1	0	Inf	1
MS4A2	1	3.03764e-235	3.29202e+234	1
CTAG1B	1	0	Inf	1
ADM	1	1.05472e-121	9.48123e+120	1
HLA.DMA	1	2.86372e-20	3.49196e+19	1
GZMB	1	5.86744e-124	1.70432e+123	1
CCL20	1	1.01928e-59	9.81083e+58	1
CSF3R	1	8.70951e-134	1.14817e+133	1
MS4A1	1	4.31544e-72	2.31726e+71	1
HLA.DOB	1	0	Inf	1
S100A9	1	5.9106e-63	1.69188e+62	1
CCL18	1.02237	0	Inf	0.999957
MAGEA12	1	9.80931e-131	1.01944e+130	1
CXCL12	1	2.58719e-172	3.8652e+171	1
NT5E	1	1.61767e-130	6.18174e+129	1
CXCL11	0.670607	2.16748e-255	2.07483e+254	0.998934
CYBB	1	4.13032e-196	2.42112e+195	1
CD86	1	0	Inf	1
TNF	1	0	Inf	1
IFIT1	1	0	Inf	1
PTPRC	0.00913161	2.56908462086384e-314	Inf	0.989763
CCR4	1	0	Inf	1
CPA3	1	0	Inf	1
FGF13	1	0	Inf	1
FUT4	1	3.57127e-218	2.80013e+217	1
ICOSLG	1	3.80817e-90	2.62594e+89	1
IL2	1	1.87746e-147	5.32634e+146	1
CD40LG	1	1.89848e-99	5.26738e+98	1
CD209	1	0	Inf	1
CCL22	1	1.92207e-45	5.20272e+44	1
IFI27	1	1.3105e-15	763067311383739	1
VEGFA	1	6.33858e-21	1.57764e+20	1
BRCA2	1	1.38306e-283	7.23034e+282	1
CD163	1	0	Inf	1
NKG7	1	0	Inf	1
CCL2	1	0	Inf	1
STAT4	1	0	Inf	1
TLR9	1	7.95495e-35	1.25708e+34	1
IL12RB2	1	6.47677e-90	1.54398e+89	1
PRF1	1	4.10232e-141	2.43765e+140	1
CD44	0.999307	8.72412e-05	11446.6	0.999884
IL2RB	1	0	Inf	1
ITGAM	1	1.91365e-92	5.22562e+91	1
CXCL9	1	8.81429e-146	1.13452e+145	1
TBP	1	3.66942e-24	2.72523e+23	1
CD244	1	0	Inf	1
CXCR4	1	2.00483e-42	4.98795e+41	1
PTEN	1	4.58536e-41	2.18085e+40	1
TNFRSF9	1	0	Inf	1
MRC1	1	0	Inf	1
CXCL1	1	4.36222e-12	2.29241e+11	1
GZMH	1	3.60901e-208	2.77084e+207	1
SNAI1	1	5.71213e-109	1.75066e+108	1
MS4A4A	1	7.16231e-299	1.3962e+298	1
TCL1A	1	0	Inf	1
TNFSF18	1	0	Inf	1
IDO1	1	5.8133e-229	1.72019e+228	1
CD247	1	5.16926e-08	1.93451e+07	1
VTCN1	1	3.85091e-116	2.59679e+115	1
MKI67	1	1.33587e-90	7.48573e+89	1
CCL21	1	8.95858e-258	1.11625e+257	1
TIGIT	1	5.33976e-216	1.87274e+215	1
ATM	1	2.57099e-200	3.88956e+199	1
CD48	1	0	Inf	1
PSMB9	1	2.05513e-208	4.86587e+207	1
LILRB2	1	1.2555e-283	7.96497e+282	1
CSF2	1	0	Inf	1
PDGFB	1	2.08897e-257	4.78705e+256	1
IL18	1	0	Inf	1
IL10	1	0	Inf	1
TNFSF10	1	4.43015e-214	2.25726e+213	1
SIGLEC5	1	2.62524e-221	3.80918e+220	1
VCAM1	1	2.77614e-81	3.60213e+80	1
HDC	1	0	Inf	1
MAGEA4	1	1.56344e-290	6.39614e+289	1
ANGPT2	1	0	Inf	1
PMS2	1	1.482e-176	6.74763e+175	1
TAP1	1	2.38793e-150	4.18773e+149	1
RAD51	1	9.9478e-66	1.00525e+65	1
CD276	1	6.52214e-62	1.53324e+61	1
S100A8	1	9.80501e-37	1.01989e+36	1
CD80	1	0	Inf	1
CCL13	1	0	Inf	1
BIRC5	1	2.59659e-152	3.85121e+151	1
CD3G	1	8.99926e-203	1.1112e+202	1
ZAP70	1	3.30068e-116	3.02968e+115	1
ISG15	1	8.94983e-196	1.11734e+195	1
ZEB1	1	4.95484e-156	2.01823e+155	1
CTSS	1	3.87983e-87	2.57743e+86	1
TNFRSF14	1	2.29996e-170	4.34791e+169	1
TNFRSF18	1	0	Inf	1
PVR	1	6.92506e-191	1.44403e+190	1
MMP9	1	3.24269e-37	3.08386e+36	1
CD69	1	0	Inf	1
PIK3CA	1	0	Inf	1
TNFRSF4	1	0	Inf	1
PTGS2	1	1.72883e-13	5.78425e+12	1
BLK	1	0	Inf	1
IL1A	1	0	Inf	1
CEACAM3	1	0	Inf	1
CMKLR1	1	0	Inf	1
ARG1	1	1.73352e-147	5.76861e+146	1
S100A12	1	1.7456e-79	5.72868e+78	1
OAS3	1	1.13325e-299	8.82417e+298	1
TWIST1	1	2.80065e-118	3.5706e+117	1
CD84	1	2.12744e-96	4.70049e+95	1
PNOC	1	1.97987e-285	5.05083e+284	1
TNFRSF17	1	0	Inf	1
IL1B	1	0	Inf	1
BLM	1	1.18391e-171	8.44655e+170	1
CCL5	1	1.22045e-110	8.1937e+109	1
KLRD1	1	0	Inf	1
CD8A	1	3.02042e-178	3.3108e+177	1
PIK3CD	1	1.17294e-46	8.5256e+45	1
RUNX3	1	1.92691e-09	5.18964e+08	1
CSF1R	1	3.77213e-68	2.65102e+67	1
ADORA2A	1	2.944730062343e-319	Inf	1
IFIT3	1	0	Inf	1
CCL4	1	3.86795e-36	2.58535e+35	1
HLA.DOA	1	2.09486e-28	4.77359e+27	1
CX3CR1	1	5.8386e-277	1.71274e+276	1
IFI6	1	8.55995e-86	1.16823e+85	1
BRIP1	1	2.96867e-187	3.36851e+186	1
CD47	1	1.23548e-36	8.09399e+35	1
CCND1	1	2.789e-55	3.58552e+54	1
TNFRSF1B	0.976968	1.93248e-282	4.93907e+281	0.999944
IRF9	1	4.56961e-94	2.18837e+93	1
SH2D1A	1	0	Inf	1
MAGEA1	1	0	Inf	1
CXCL8	1	2.24432e-17	4.4557e+16	1
IFITM2	1	3.52188e-83	2.83939e+82	1
CD38	1	1.77553e-180	5.63211e+179	1
CD27	1	0	Inf	1
NECTIN2	1	1.06225e-114	9.41396e+113	1
MLANA	1	0	Inf	1
ITGB2	1	5.86729e-29	1.70436e+28	1
TLR3	1	0	Inf	1
CXCL5	1	3.41892e-61	2.9249e+60	1
STAT3	1	2.65548e-37	3.76579e+36	1
AKT1	1	5.64333e-27	1.772e+26	1
ITGAX	1	5.26795e-205	1.89827e+204	1
CTLA4	0.0290281	2.39487e-301	3.51848e+297	0.991963
MAGEC2	1	1.11518e-37	8.96719e+36	1
PDGFA	1	0	Inf	1
FCGR1A	1	7.75952e-93	1.28874e+92	1
MLH1	1	9.79428e-181	1.021e+180	1
KLRK1	1	5.88336e-114	1.69971e+113	1
TBX21	1	0	Inf	1
TNFRSF1A	1	4.08993e-98	2.44503e+97	1
FOXP3	1	0	Inf	1
MYC	1	1.05173e-22	9.50817e+21	1
TIE1	1	4.99447e-59	2.00221e+58	1
SLAMF7	1	6.85152e-29	1.45953e+28	1
MELK	1	7.28066e-214	1.3735e+213	1
GBP1	1	1.85978e-181	5.37697e+180	1
CD8B	1	0	Inf	1
CD79B	1	0	Inf	1
CD14	1	2.9047e-249	3.44269e+248	1
CXCL13	1	4.78553e-266	2.08963e+265	1
MX1	1	1.15642e-61	8.64737e+60	1
TNFSF4	1	3.24973e-19	3.07718e+18	1
CSF2RB	1	0	Inf	1
RORC	1	4.24513e-97	2.35564e+96	1
FCAR	1	1.55858e-159	6.41609e+158	1
CCL7	1	0	Inf	1
KLRB1	1	0	Inf	1
PTPN11	1	1.13999e-72	8.77202e+71	1
BCL2	1	5.0723e-19	1.97149e+18	1
CD2	1	2.58253e-48	3.87217e+47	1
HLA.DRA	0.991319	1.9402e-102	5.065e+101	0.999942
LAG3	1	0	Inf	1
MSH2	1	4.51219e-248	2.21622e+247	1
KIR3DL1	1.12738	0	Inf	0.9999
TLR8	1	0	Inf	1
CD4	1	0	Inf	1
CXCL10	1	0	Inf	1
ICAM1	1	3.73216e-123	2.67941e+122	1
CX3CL1	1	0	Inf	1
FASLG	1	0	Inf	1
OAS2	1	5.48392e-50	1.82351e+49	1
CXCR6	1	2.4754e-130	4.03974e+129	1
HIF1A	1	5.68441e-65	1.7592e+64	1
NCAM1	1	0	Inf	1
GZMK	1	1.72547e-80	5.79552e+79	1
POLR2A	1	6.63288e-61	1.50764e+60	1
NCR1	1	0	Inf	1
NBN	1	4.33705e-61	2.30571e+60	1
OAS1	1	2.73626e-94	3.65462e+93	1
IFITM1	1	1.29214e-47	7.73912e+46	1
CD19	1	0	Inf	1
FAS	1	7.23858e-250	1.38149e+249	1
CD6	1	1.16782e-21	8.56297e+20	1
STAT1	1	5.29541e-193	1.88843e+192	1
MSH6	1	0	Inf	1
IL2RA	1	6.00141e-65	1.66627e+64	1
TPSAB1	1	1.13515e-18	8.80944e+17	1
HLA.DQA1	1	2.86441e-107	3.49112e+106	1
PRR5	1	8.13941e-303	1.22859e+302	1
GZMM	1	2.71273e-32	3.68633e+31	1
HLA.E	1	4.46991e-12	2.23718e+11	1
PF4	1	1.56304e-13	6.39779e+12	1
HLA.DRB1	1	5.96119e-17	1.67752e+16	1
UBB	1	3.6669e-12	2.7271e+11	1
OAZ1	1	4.24023e-36	2.35836e+35	1
TBC1D10B	1	0	Inf	1
FCGR3B	1	2.89431e-261	3.45506e+260	1
CXCL2	1	1.48563e-48	6.73115e+47	1
STK11IP	1	7.99957e-05	12500.7	1
