# Supplementary material for: Gamma Knife stereotactic radiotherapy combined with tislelizumab as later-line therapy in pMMR/MSS/MSI-L metastatic colorectal cancer: a phase II trial analysis
Source: eLife. 2025 Jun 26;14:RP103559. doi: 10.7554/eLife.103559 (PMC12201948; doi:10.7554/eLife.103559)
Supplement: Supplementary file 2. [file elife-103559-supp2.xlsx]

## Sheet: Supplementary Table1 (Fig 3C)
Cell type	Gene list
T cells	CD3D、CD3E、CD3G、CD6、SH2D1A、TRAT1
B cells	BLK、CD19、FCRL2、MS4A1、PNOC、SPIB、TCL1A、TNFRSF17、BLTA、CD79A/B
Mast cells	CPA3、HDC、MS4A2、TPSAB1
DC	CCL13、CD209、HSD11B1、CCL22
Macrophages	CD163、CD68、CD84、MS4A4A
Neutrophils	CEACAM3、CSF3R、FCAR、FPR1、S100A12、SIGLEC5
Cytotoxic cells	CTSW、GNLY、GZMA/B/H、KLRB1、KLRD1、KLRK1、NKG7、PRFI
Exhausted CD8	PTGER4、LAG3、EOMES、CD244
NK CD56 cell	KIR3DL1/2、IL21R
CD8 T cell	CD8B、CD8A
CD45 cell	PTPRC
Thl cell	TBX21、IL2、IL12RB2
Th2 cell	CCR4、IL4、CXCR6
NK cell	NCRI、GZMH、CD244、KLRK1、NKG7
Treg cell	FOXP3、IL2RB、ENTPD1
Terminally exhausted T cells	PDCD1、CTLA4、HAVCR2、ENTPD1、ITGAE
Progenitor exhausted T cells	IL7R、GZMK、T-bet(TBX21)
Tumor infiltrating lymphocyte	CD40、MS4A1、TCL1A、CD247、CD3G、KLRD1、PIK3CD、KLRK1、GZMK、CD6、CD2

## Sheet: Supplementary Table2 (Fig 4A)
Gene	Sig
PECAM1	Angiogenesis
VEGFA	Angiogenesis
CD40	APC co-stimulation
ICOSLG	APC co-stimulation
TNFSF18	APC co-stimulation
TNFSF4	APC co-stimulation
CCL51	Chemokines
CCR5	Chemokines
CXCL93	Chemokines
CXCR61	Chemokines
GZMA	Cytolytic activity
PRF11	Cytolytic activity
CD8A1	Cytotoxic
CD8B	Cytotoxic
GZMA1	Cytotoxic
GZMB1	Cytotoxic
PRF12	Cytotoxic
CXCL10	IFN-γ
CXCL9	IFN-γ
HLA-DRA	IFN-γ
IDO1	IFN-γ
IFNG	IFN-γ
STAT1	IFN-γ
CXCL101	Inflammation-promoting
CXCL13	Inflammation-promoting
GZMB2	Inflammation-promoting
IFNG1	Inflammation-promoting
CXCL102	Parainflammation
IFIT1	Parainflammation
MX1	Parainflammation
OAS2	Parainflammation
CD2	T cell co-stimulation
CD28	T cell co-stimulation
CD40LG	T cell co-stimulation
ICOS	T cell co-stimulation
TNFRSF9	T cell co-stimulation
CCL5	T cell-inflamed
CD27	T cell-inflamed
CD274	T cell-inflamed
CD276	T cell-inflamed
CD8A	T cell-inflamed
CMKLR1	T cell-inflamed
CXCL91	T cell-inflamed
CXCR6	T cell-inflamed
HLA-DQA1	T cell-inflamed
HLA-DRB1	T cell-inflamed
HLA-E	T cell-inflamed
IDO11	T cell-inflamed
LAG3	T cell-inflamed
NKG7	T cell-inflamed
PDCD1LG2	T cell-inflamed
PSMB10	T cell-inflamed
STAT11	T cell-inflamed
TIGIT	T cell-inflamed
CXCL92	Effector T cell
GZMB	Effector T cell
PRF1	Effector T cell
CCR2	Tumor infiltrating lymphocyte
CD21	Tumor infiltrating lymphocyte
CD247	Tumor infiltrating lymphocyte
CD38	Tumor infiltrating lymphocyte
CD3G	Tumor infiltrating lymphocyte
CD401	Tumor infiltrating lymphocyte
CD6	Tumor infiltrating lymphocyte
GZMK	Tumor infiltrating lymphocyte
KLRD1	Tumor infiltrating lymphocyte
KLRK1	Tumor infiltrating lymphocyte
MS4A1	Tumor infiltrating lymphocyte
PIK3CD	Tumor infiltrating lymphocyte
STAT4	Tumor infiltrating lymphocyte
TCL1A	Tumor infiltrating lymphocyte
TIGIT1	Tumor infiltrating lymphocyte

## Sheet: Supplementary Table3 (Fig 5A)
Gene	Sig
ENTPD1	Treg cell
IL2RB	Treg cell
FOXP3	Treg cell
PDCD1	Terminally exhausted T cells
ENTPD11	Terminally exhausted T cells
ITGAE	Terminally exhausted T cells
HAVCR2	Terminally exhausted T cells
CTLA4	Terminally exhausted T cells
IL7R	Progenitor exhausted T cells
TBX21	Progenitor exhausted T cells
GZMK	Progenitor exhausted T cells
IL4	Th2 cell
CCR4	Th2 cell
CXCR6	Th2 cell
PDCD1LG2	APC co inhibition
CD274	APC co inhibition
BTLA	T cell co-inhibition
CD2741	T cell co-inhibition
HAVCR21	T cell co-inhibition
TIGIT	T cell co-inhibition
LAG3	T cell co-inhibition
PTGER4	Exhausted CD8
EOMES	Exhausted CD8
CD244	Exhausted CD8
LAG31	Exhausted CD8

## Sheet: Supplementary Table4 (Fig 5C)
Gene	Sig
ANGPT2	Angiogenesis/Fibroblasts
CXCL1	Angiogenesis/Fibroblasts
CXCL2	Angiogenesis/Fibroblasts
CXCL5	Angiogenesis/Fibroblasts
CXCL8	Angiogenesis/Fibroblasts
CXCL12	Angiogenesis/Fibroblasts
CXCR2	Angiogenesis/Fibroblasts
FCGR3B	Angiogenesis/Fibroblasts
MMP9	Angiogenesis/Fibroblasts
TGFB1	Angiogenesis/Fibroblasts
VEGFA	Angiogenesis/Fibroblasts
PECAM1	Angiogenesis/Fibroblasts
